# Supplementary material for: Virtual Reality-Based Exercise Therapy for Patients with Chronic Musculoskeletal Pain: A Scoping Review
Source: MDPI journal article supplement (doi:10.3390/healthcare11172412), 2023-08-28
Supplement: s1 [file s1]

**Table S3.** Assessment of Methodological Quality Based on PEDro Scale and Main Findings per Study.

| Study                         | Eligibility criteria & source | Random allocation | Concealed allocation | Baseline comparability | Blinding of participants | Blinding of therapists | Blinding of assessors | Adequate follow-up (> 85%) | Intention-to-treat analysis | Between-group statistical comparisons | Reporting of point measures & measures of variability | Total Score | Rating | Main Findings                                                                                                                                                                                                                                                                                                                                                                                                                                                                                                                                                                                                                                                                                                                                                                                                                                                                                                                                                                                                                                                                                                            |
|-------------------------------|-------------------------------|-------------------|----------------------|------------------------|--------------------------|------------------------|-----------------------|----------------------------|-----------------------------|---------------------------------------|-------------------------------------------------------|-------------|--------|--------------------------------------------------------------------------------------------------------------------------------------------------------------------------------------------------------------------------------------------------------------------------------------------------------------------------------------------------------------------------------------------------------------------------------------------------------------------------------------------------------------------------------------------------------------------------------------------------------------------------------------------------------------------------------------------------------------------------------------------------------------------------------------------------------------------------------------------------------------------------------------------------------------------------------------------------------------------------------------------------------------------------------------------------------------------------------------------------------------------------|
| Sarig Bahat et al., 2015 [29] | Y                             | Y                 | Y                    | Y                      | N                        | N                      | Y                     | N                          | Y                           | Y                                     | Y                                                     | 7/10        | Good   | <p><b>Within-group analysis</b><br/> KTVR: VAS ↓ post-intervention, step test ↑, NDI↓ post-intervention and 3-month follow-up, ROM<sub>rotL</sub>↑, ROM<sub>rotR</sub>↑, ROM<sub>flex</sub>↑ post-intervention and 3-month follow-up, ROM<sub>Ext</sub>↑ 3-month follow-up, 9/14 velocity module post-intervention, 5/14 velocity module 3-month follow-up, TSK↔, GPE↑ post-intervention, good satisfaction from therapy,<br/> KT: NDI↓ post-intervention<br/> ROM<sub>rotL</sub>↑, ROM<sub>rotR</sub>↑, post-intervention and 3-month follow-up, ROM<sub>flex</sub>↑ 3-month follow-up, 2/14 velocity module post-intervention, 9/14 velocity module 3-month follow-up, GPE↑ post-intervention, good satisfaction from therapy, VAS↔, TSK↔, step test ↑</p> <p><b>Between-groups analysis</b><br/> KTVR was not superior to the KT training<br/> GPE↑: KTRV&gt;KT 3-month follow-up<br/> ROM<sub>flex</sub>: KTVR &gt;KT post-intervention<br/> ROM<sub>rotR</sub>: KTVR&lt; KT post-intervention<br/> Peak velocity (R and L): KTVR&lt; KT 3-month follow-up<br/> Mean velocity (R): KTVR&lt; KT 3-month follow-up</p> |

|                               |   |   |   |   |   |   |   |   |   |   |   |      |      |                                                                                                                                                                                                                                                                                                                                                                                                                                                                                                                                                                                                                                                                                                                                                                                                                                                                                                                                                                                            |
|-------------------------------|---|---|---|---|---|---|---|---|---|---|---|------|------|--------------------------------------------------------------------------------------------------------------------------------------------------------------------------------------------------------------------------------------------------------------------------------------------------------------------------------------------------------------------------------------------------------------------------------------------------------------------------------------------------------------------------------------------------------------------------------------------------------------------------------------------------------------------------------------------------------------------------------------------------------------------------------------------------------------------------------------------------------------------------------------------------------------------------------------------------------------------------------------------|
| Sarig Bahat et al., 2018 [30] | N | Y | Y | Y | N | N | Y | N | Y | Y | Y | 7/10 | Good | <p><b>Within-group analysis</b><br/> VR group: NDI↓, Vmean↑, Vpeak↑, VAS↓, EQ5D↑, TSK↔, NVP↔, ROM↔, TTP%↑ (except TTP<sub>E</sub>%), Accuracy error↓ (except accuracy error<sub>E</sub>)<br/> Laser group: NDI↓, Vmean↑ (except RR), Vpeak↑ (except LR), VAS↓, TSK↔, NVP<sub>E</sub>↑, NVP<sub>RR</sub>↑, ROM↔, TTP%↑ (except TTP<sub>E</sub>% &amp; TTP<sub>RR</sub>%), Accuracy error↔<br/> CG: NDI↔, Vmean ↔, Vpeak↔, VAS↔, EQ5D↔, TSK↔, NVP↔, ROM↔, TTP↔, Accuracy error↔</p> <p><b>Between-groups analysis</b><br/> NDI, Vmean, Vpeak (except LR), TTP<sub>F</sub>% &amp; TTP<sub>LR</sub>%, Accuracy error (F &amp; RR): VR&gt;CG<br/> VAS, Vmean (except RR), Vpeak (except F and RR), EQ5D, Accuracy error<sub>F</sub>: VR&gt; Laser<br/> There were no group GPE differences.<br/> The number of home exercise sessions was significantly higher for the laser group (mean 18.29 ± 8.63 or 4.5 times per week) compared to the VR group (14.36 ± 5.78 or 3.5 times per week).</p> |
| Tejera et al., 2020 [31]      | Y | Y | N | Y | N | N | N | Y | Y | Y | Y | 6/10 | Good | <p><b>Within-group analysis</b><br/> VR: VAS↓, ROM ↔, NDI↓, PPT↑, TSK↓, PCS↓, TS↔, CPM↔, FABQ↓<br/> CG: VAS↓, ROM ↔, NDI↓, PPT↑, TSK↓, PCS↓, TS↔, CPM↔, FABQ↓</p> <p><b>Between-groups analysis</b><br/> VAS, ROM, NDI, PCS, PPTs, CPM, TS: VR=Control<br/> TSK: VR&gt;Control (VR Group had better improvement in 3 months follow-up)</p>                                                                                                                                                                                                                                                                                                                                                                                                                                                                                                                                                                                                                                                 |
| Nambi et al., 2020            | Y | Y | N | Y | N | N | N | Y | Y | Y | Y | 6/10 | Good | VR and IKT groups: VAS ↓ after 4 weeks and 6 months, Kinesiophobia ↓ after 4 weeks and 6 months                                                                                                                                                                                                                                                                                                                                                                                                                                                                                                                                                                                                                                                                                                                                                                                                                                                                                            |

|                          |   |   |   |   |   |   |   |   |   |   |   |      |      |                                                                                                                                                                                                                                                                                                                                                                                                                                                                                                                                         |
|--------------------------|---|---|---|---|---|---|---|---|---|---|---|------|------|-----------------------------------------------------------------------------------------------------------------------------------------------------------------------------------------------------------------------------------------------------------------------------------------------------------------------------------------------------------------------------------------------------------------------------------------------------------------------------------------------------------------------------------------|
| [33]                     |   |   |   |   |   |   |   |   |   |   |   |      |      | Blood serum stress hormones: subjects with cLBP exhibited a slightly greater improvement when using VR compared to IKT                                                                                                                                                                                                                                                                                                                                                                                                                  |
| Garcia et al., 2021 [27] | Y | Y | Y | Y | N | N | N | Y | Y | Y | N | 6/10 | Good | Pain intensity↓, pain-related interference in activity↓, mood↑, and stress post-treatment↓, user satisfaction, patient's Global Impression of Change, PROMIS physical function: EaseVRx > Sham 2D VR<br>Treatment engagement, usability, sleep disturbance: EaseVRx = Sham 2D VR<br>Neither group evidenced a significant change in opioid treatment, pain catastrophizing, pain self-efficacy, and pain acceptance.                                                                                                                    |
| Cetin et al., 2022 [28]  | Y | Y | N | Y | N | N | N | N | Y | Y | Y | 5/10 | Fair | <b>Within-group analysis</b><br>VR: ROM↑, JPSEs↑, PPTs↑, muscle strength↑, muscle endurance↑, ProFitMap-Neck↓, some parameters of SF-36↑<br>MC: ROM↑ (except lateral flexions), some PPTs↑, muscle strength↑, ProFitMap-Neck↓, some parameters of SF-36↑<br><b>Between-groups analysis</b><br>VAS, muscle strength, muscle endurance, HADS, SF-36, ProFitMap-Neck, PPT <sub>UT</sub> , PPT <sub>TA</sub> : VR=MC<br>PPT <sub>C1/C2</sub> & PPT <sub>C5/C6</sub> , JPSEs: VR>MC<br>ProFitMap-Neck (functional limitation index)<br>VR>MC |

CG= Control Group, cLBP= Chronic Low Back Pain, CPM=Conditioned Pain Modulation, E= Extension, F= Flexion, EQ5D= EuroQol 5 Dimension, FABQ= Fear-Avoidance Beliefs Questionnaire, GPE= Global perceived effect, HADS= Hospital Anxiety and Depression Scale, IKT=Isokinetic Training, JPSE= Joint Position Sense Error, KT= Kinematic Training, KTVR=Kinematic Training plus Virtual Reality, LR= Left Rotation, N=No, NVP = Number of velocity peaks, PCS= Pain Catastrophizing Scale, PPT = Pressure Pain Threshold, Pro-Fit-Map neck=Profile Fitness Mapping Neck Questionnaire, PROMIS= Physical Function and Sleep Disturbance, RR= Right Rotation, ROM= Range of Motion, SF-36= 36-item short form survey, SMG= Sensorimotor Group, TS= Temporal Summation, TSK=Tampa Scale for Kinesiophobia, TTP% =Time to peak velocity percentage, TTP% =Time to peak velocity percentage, TTP<sub>E</sub>%= Time to peak velocity percentage for Extension, TTP<sub>F</sub>%= Time to peak velocity percentage for Flexion, TTP<sub>RR</sub>%= Time to peak velocity percentage for Extension for Left Rotation, TTP<sub>RR</sub>%= Time to peak velocity

percentage for Extension for Right Rotation, Vmean= mean velocity, Vpeak= peak velocity, VAS= Visual Analogue Scale, VR= Virtual Reality, VRT= Virtual Reality Training, VRG=Virtual Reality Group, Y= Yes
